# Supplementary material
Source: PubMed Central journal article supplement (PMC8765363)
Supplement: ehp9509.smcontents.508.pdf [file ehp9509.smcontents.508.pdf]

**Note to readers with disabilities:** *EHP* strives to ensure that all journal content is accessible to all readers. However, some figures and Supplemental Material published in *EHP* articles may not conform to [508 standards](#) due to the complexity of the information being presented. If you need assistance accessing journal content, please contact [ehp508@niehs.nih.gov](mailto:ehp508@niehs.nih.gov). Our staff will work with you to assess and meet your accessibility needs within 3 working days.

### **Supplemental Material**

#### **Prenatal Exposure to Air Pollution and Autism Spectrum Disorder: Sensitive Windows of Exposure and Sex Differences**

Md Mostafijur Rahman, Yu-Hsiang Shu, Ting Chow, Frederick W. Lurmann, Xin Yu, Mayra P. Martinez, Sarah A. Carter, Sandrah P. Eckel, Jiu-Chiuan Chen, Zhanghua Chen, Pat Levitt, Joel Schwartz, Rob McConnell, and Anny H. Xiang

#### **Table of Contents**

**Table S1.** Characteristics of samples included vs. excluded.

**Table S2.** Air pollutants concentrations during entire year, dry season, and wet season.

**Table S3.** Correlations between air pollutants during entire year, dry season, and wet season.

**Figure S1.** Deviation of study sample.

**Figure S2.** Distribution of PM<sub>2.5</sub>, NO<sub>2</sub>, and O<sub>3</sub> concentrations during pregnancy across birth year 2001-2014. The solid, long dash, dotted boxes represent the distribution of PM<sub>2.5</sub>, NO<sub>2</sub>, and O<sub>3</sub>, respectively. The box shows the interquartile range, the line in the box is the median, and the diamond is the mean. The whiskers represent the upper 25% and lower 25% of the data.

**Figure S3.** Association between weekly PM<sub>2.5</sub>, NO<sub>2</sub>, and O<sub>3</sub> exposures over gestation and ASD among boys and girls when follow-up was censored at child age five such that all children reached the minimum of age 5 with a maximum follow-up till age 5 (N= 294,937). Gray shade indicates 95% confidence intervals; dashed vertical lines demarcate trimesters. All the models were adjusted for child sex, maternal race/ethnicity, maternal age at delivery, parity, education, maternal comorbidities, medical centers, household income, birth year, and season.

**Figure S4.** Association between weekly PM<sub>2.5</sub>, NO<sub>2</sub>, and O<sub>3</sub> exposures over gestation and ASD among boys and girls when only full-term births  $\geq 39$  gestational weeks were included (total 220,981 singleton children). Gray shade indicates 95% confidence intervals; dashed vertical lines demarcate trimesters. All the models were adjusted for child sex, maternal race/ethnicity, maternal age at delivery, parity, education, maternal comorbidities, medical centers, household income, birth year, and season.

**Figure S5.** Association between weekly PM<sub>2.5</sub>, NO<sub>2</sub>, and O<sub>3</sub> exposures over gestation and ASD among boys and girls when further adjusting for pre-pregnancy obesity and diabetes along with covariates included in primary analyses. Gray shade indicates 95% confidence intervals; dashed vertical lines demarcate trimesters.

**Example R code of DLM modeling**
